# Supplementary material for: Association of the estimated glucose disposal rate with Heart failure mortality : a prospective cohort study
Source: Research Square preprint supplement (doi:10.21203/rs.3.rs-6389994/v1), 2025-05-07
Supplement: Supplementary file 1 [file 028f154c8cc351e5b61d048a.docx]

Table S1

Baseline characteristics of participants between the deceased group(Die) and the non deceased group(Con)

| group | Total(N=1632) | Con(N=1010) | Die(N=622) | p-Value |
| --- | --- | --- | --- | --- |
| Age,mean(SD) | 61.62±6.23 | 60.64±6.58 | 63.21±5.24 | <0.001 |
| Body mass index,kg/m2, mean(SD) | 29.69±5.56 | 29.26±5.18 | 30.40±6.07 | <0.001 |
| Sleep duration,hours/day, mean(SD) | 7.28±1.37 | 7.31±1.27 | 7.21±1.53 | 0.147 |
| Townsend deprivation index, mean(SD) | -0.86±3.32 | -1.13±3.20 | -0.42±3.45 | <0.001 |
| Glycated haemoglobin (HbA1c), %, mean(SD) | 5.82±0.87 | 5.69±0.73 | 6.04±1.03 | <0.001 |
| LDL, mmol/L, mean(SD) | 2.92±0.87 | 2.97±0.90 | 2.84±0.82 | 0.004 |
| HDL, mmol/L, mean(SD) | 1.22±0.34 | 1.24±0.35 | 1.18±0.33 | <0.001 |
| Triglycerides, mmol/L, mean(SD) | 2.01±1.22 | 1.97±1.25 | 2.08±1.33 | 0.082 |
| eGDR (mg/kg/min), mean(SD) | 6.08±2.16 | 6.40±2.12 | 5.58±2.13 | <0.001 |
| Sex, female, N (%) | 343(21.02%) | 242(23.96%) | 101(16.24%) | <0.001 |
| Race, white, N (%) | 1504(92.16%) | 932(92.28%) | 572(91.96%) | 0.818 |
| Smoking status, N (%) |  |  |  | <0.001 |
| Never | 600(36.76%) | 418(41.39%) | 182(29.26%) |  |
| Former | 824(50.49%) | 492(48.71%) | 332(53.38%) |  |
| Current | 208(12.75%) | 100(9.90%) | 108(17.36%) |  |
| Alcohol consuption, N (%) |  |  |  | 0.027 |
| Never | 80(4.90%) | 43(4.26%) | 37(5.95%) |  |
| Former | 126(7.72%) | 67(6.63%) | 59(9.49%) |  |
| Current | 1426(87.38%) | 900(89.11%) | 526(84.57%) |  |
| Activity,IPAQ, N (%) |  |  |  | <0.001 |
| Low | 424(25.98%) | 235(23.27%) | 189(30.39%) |  |
| Moderate | 648(39.71%) | 394(39.01%) | 254(40.84%) |  |
| High | 560(34.31%) | 381(37.72%) | 179(28.78%) |  |
| Chronic Kidney Disease, N (%) | 165(10.11%) | 66(6.53%) | 99(15.92%) | <0.001 |
| Hypertension, N (%) | 1098(67.28%) | 644(63.76%) | 454(72.99%) | <0.001 |
| Hyperlipidemia, N (%) | 952(58.33%) | 562(55.64%) | 390(62.70%) | 0.005 |
| Depression, N (%) | 196(12.01%) | 119(11.78%) | 77(12.38%) | 0.719 |
| Blood pressure medication, N (%) | 219(13.42%) | 138(13.66%) | 81(13.02%) | 0.712 |
| Cholesterol lowering medication, N (%) | 1126(69.00%) | 671(66.44%) | 455(73.15%) | 0.004 |

Values for categorical variables are presented as count (%), and values for continuous variables are presented as mean ± SD

Abbreviations: BMI: body mass index, TDI: Townsend deprivation index, HbA1c: hemoglobin A1c, LDL: lower-density lipoprotein cholesterol; HDL: high-density lipoprotein cholesterol;

Table S2

The associations of eGDR with mortality rate of HF patients after removing participants who were diagnosed with heart failure more than 6 years in the UK Biobank(N=1046).

|  | Model II HR(95%CI) | P-value |
| --- | --- | --- |
| eGDR(continuous) | 0.88(0.81,0.96) | <0.01 |
| --Categorical |  |  |
| eGDR < 4 mg/kg/min | Ref (1.00) | 1.00 |
| eGDR 4–5.99 mg/kg/min | 0.65(0.47,0.89) | <0.01 |
| eGDR 6–7.99 mg/kg/min | 0.53(0.35,0.82) | <0.01 |
| eGDR ≥ 8 mg/kg/min | 0.54(0.32,0.93) | 0.03 |
| P trend | <0.01 |  |

Table S3

The associations of eGDR with mortality rate of HF patients after excluding those who died within 2 years of follow-up in the UK Biobank(N=1568).

|  | Model II HR(95%CI) | P-value |
| --- | --- | --- |
| eGDR(continuous) | 0.89(0.83,0.96) | <0.01 |
| Categorical |  |  |
| eGDR < 4 mg/kg/min | Ref (1.00) | 1.00 |
| eGDR 4–5.99 mg/kg/min | 0.72(0.55,0.95) | 0.02 |
| eGDR 6–7.99 mg/kg/min | 0.70(0.49,0.99) | 0.04 |
| eGDR ≥ 8 mg/kg/min | 0.61(0.40,0.97) | 0.04 |
| P trend | <0.01 |  |

Table S4

The associations of eGDR with mortality rate of HF patients after excluding those who had diabetes during follow-up in the UK Biobank(N=1600).

|  | Model II HR(95%CI) | P-value |
| --- | --- | --- |
| eGDR(continuous) | 0.91(0.85,0.98) | <0.01 |
| Categorical |  |  |
| eGDR < 4 mg/kg/min | Ref (1.00) | 1.00 |
| eGDR 4–5.99 mg/kg/min | 0.70(0.54,0.92) | 0.01 |
| eGDR 6–7.99 mg/kg/min | 0.69(0.49,0.98) | 0.04 |
| eGDR ≥ 8 mg/kg/min | 0.64(0.41,1.00) | 0.05 |
| P trend | <0.01 |  |
